# Supplementary material for: Life Cycle Assessments of Circular Economy in the Built Environment—A Scoping Review
Source: MDPI journal article supplement (doi:10.3390/su14116887), 2022-06-05
Supplement: s1 [file s1]

Archive with 1 entries (1 files):
- sustainability-1728489-supplementary.pdf
