# Supplementary material for: Life Cycle Assessments of Circular Economy in the Built Environment—A Scoping Review
Source: MDPI journal article supplement (doi:10.3390/su14116887), 2022-06-05
Supplement: s1 [file s1 › sustainability-1728489-supplementary.pdf]

Table S1. Case study characteristics

| Ref.                                  | Country of case                             | CE temporality | CE cycles [#]                                              |
|---------------------------------------|---------------------------------------------|----------------|------------------------------------------------------------|
| <b>(Bonoli et al., 2020)</b>          | Italy                                       | Up front       | 1                                                          |
| <b>(van Stijn et al., 2021)</b>       | The Netherlands                             | Both           | 1-4, depending on design and component part                |
| <b>(Wiprachtiger et al., 2020)</b>    | Switzerland                                 | Prospective    | 1                                                          |
| <b>(Romnée et al., 2019)</b>          | Belgium                                     | Both           | 1                                                          |
| <b>(Sanchez et al., 2019)</b>         | Canada                                      | Up front       | 1                                                          |
| <b>(Sandanayake et al., 2022)</b>     | United Kingdom                              | Up front       | 1                                                          |
| <b>(Russo et al., 2021)</b>           | Not Specified                               | Up front       | 1                                                          |
| <b>(Meek et al., 2021)</b>            | Australia                                   | Up front       | 1                                                          |
| <b>(Lopez-Garcia et al., 2021)</b>    | Spain                                       | Up front       | 1                                                          |
| <b>(Toniolo et al., 2021)</b>         | Germany                                     | Both           | 1                                                          |
| <b>(Vandewalle et al., 2020)</b>      | Portugal                                    | Both           | 5 phases, however defined as maintenance for the same road |
| <b>(Caneda-martínez et al., 2021)</b> | Spain                                       | Up front       | 1                                                          |
| <b>(Caldas et al., 2021)</b>          | Brazil                                      | Up front       | 1                                                          |
| <b>(Vitale et al., 2021)</b>          | Italy                                       | Up front       | 1                                                          |
| <b>(Nußholz et al., 2019)</b>         | Sweden and Denmark                          | Up front       | 1                                                          |
| <b>(Al-Hamrani et al., 2021)</b>      | Qatar                                       | Up front       | 1                                                          |
| <b>(Silva et al., 2021)</b>           | Brazil                                      | Up front       | 1                                                          |
| <b>(Mostert et al., 2021)</b>         | Germany                                     | Up front       | 1                                                          |
| <b>(Zhang et al., 2018)</b>           | China                                       | Up front       | 1, but in metabolism                                       |
| <b>(Saadé et al., 2022)</b>           | France                                      | Both           | 1                                                          |
| <b>(Colangelo et al., 2020)</b>       | Italy                                       | Up front       | 1                                                          |
| <b>(Rodrigo-Bravo et al., 2022)</b>   | Spain                                       | Up front       | 1                                                          |
| <b>(Uceda-Rodríguez et al., 2022)</b> | Spain and Portugal, deliver clay and wastes | Up front       | 1                                                          |
| <b>(Lozano-Miralles et al., 2018)</b> | Spain                                       | Up front       | 1                                                          |

|                                      |                                                                              |             |                                         |
|--------------------------------------|------------------------------------------------------------------------------|-------------|-----------------------------------------|
| <b>(L. Eberhardt et al., 2019a)</b>  | Denmark                                                                      | Prospective | 2                                       |
| <b>(Nasir et al., 2017)</b>          | United Kingdom and France<br>(production facility placement of alternatives) | Up front    | 1                                       |
| <b>(Tsioka &amp; Voudrias, 2020)</b> | Greece                                                                       | Up front    | 1                                       |
| <b>(Diaz-Piloneta et al., 2021)</b>  | Spain                                                                        | Up front    | 1                                       |
| <b>(Buyle et al., 2019a)</b>         | Belgium                                                                      | Prospective | 1                                       |
| <b>(Liikanen et al., 2019)</b>       | Finland                                                                      | Up front    | 1                                       |
| <b>(van Stijn et al., 2020)</b>      | The Netherlands                                                              | Both        | 1                                       |
| <b>(Brütting et al., 2019)</b>       | Switzerland                                                                  | Up front    | 1                                       |
| <b>(Hossain et al., 2021)</b>        | Hong Kong                                                                    | Up front    | 1                                       |
| <b>(Terrones-Saeta et al., 2021)</b> | Spain                                                                        | Up front    | 1                                       |
| <b>(Joensuu et al., 2022)</b>        | Finland                                                                      | Prospective | 2 and 3 respectively, see above         |
| <b>(Di Maria et al., 2018)</b>       | Belgium                                                                      | Up front    | 1                                       |
| <b>(L. Eberhardt et al., 2019b)</b>  | Denmark                                                                      | Prospective | 2                                       |
| <b>(Wang et al., 2017)</b>           | China                                                                        | Up front    | 1                                       |
| <b>(Zhang et al., 2021)</b>          | Spain, the Netherlands and Sweden                                            | Both        | 1                                       |
| <b>(Dias et al., 2021)</b>           | Portugal                                                                     | Up front    | 1                                       |
| <b>(Cuenca-Moyano et al., 2019)</b>  | Spain                                                                        | Up front    | 1                                       |
| <b>(Kakkos et al., 2019)</b>         | Switzerland                                                                  | Both        | 1                                       |
| <b>(Brambilla et al., 2019)</b>      | United Kingdom                                                               | Prospective | 2                                       |
| <b>(Eberhardt et al., 2021)</b>      | Denmark                                                                      | Both        | 1, 3 or 4, depending on scenario design |
| <b>(Weimann et al., 2021)</b>        | Germany                                                                      | Up front    | 1                                       |
| <b>(Antunes et al., 2021)</b>        | Portugal                                                                     | Prospective | 1                                       |
| <b>(Ma et al., 2021)</b>             | China                                                                        | Both        | 1                                       |
| <b>(Gravagnuolo et al., 2020)</b>    | Italy                                                                        | Up front    | 1                                       |
| <b>(Suarez-Macias et al., 2021)</b>  | Spain                                                                        | Up front    | 1                                       |
| <b>(Minunno et al., 2020)</b>        | Australia                                                                    | Both        | 1                                       |
| <b>(Kim &amp; Kim, 2020)</b>         | Korea                                                                        | Up front    | 1                                       |
| <b>(Kucukvar et al., 2021)</b>       | Qatar                                                                        | Prospective | 1                                       |

|                                          |                          |             |                                                                                                                                                                                                                |
|------------------------------------------|--------------------------|-------------|----------------------------------------------------------------------------------------------------------------------------------------------------------------------------------------------------------------|
| <b>(Kio &amp; Ali, 2021)</b>             | United States of America | Up front    | 1                                                                                                                                                                                                              |
| <b>(Hossain &amp; Ng, 2019)</b>          | Hong Kong                | Prospective | 1                                                                                                                                                                                                              |
| <b>(Monteiro &amp; Soares, 2022)</b>     | Portugal                 | Prospective | 1                                                                                                                                                                                                              |
| <b>(Cascione et al., 2022)</b>           | United Kingdom           | Both        | 1 and 2                                                                                                                                                                                                        |
| <b>(Peceno et al., 2020)</b>             | Spain                    | Up front    | 1                                                                                                                                                                                                              |
| <b>(Zimmermann et al., 2020)</b>         | Denmark                  | Up front    | ½ + 1                                                                                                                                                                                                          |
| <b>(Zanni et al., 2018)</b>              | Italy                    | Up front    | 1                                                                                                                                                                                                              |
| <b>(L. C. M. Eberhardt et al., 2019)</b> | Denmark                  | Prospective | 1 assessed cycle (but DfD impact are divided over 2 and 3 cycles respectively, but not assessed)                                                                                                               |
| <b>(Rivero et al., 2016)</b>             | EU-27                    | Both        | 1                                                                                                                                                                                                              |
| <b>(Rajagopalan et al., 2021)</b>        | Belgium                  | Prospective | 60, 6 and 4 respectively                                                                                                                                                                                       |
| <b>(Ghisellini et al., 2021)</b>         | Italy                    | Up front    | 1                                                                                                                                                                                                              |
| <b>(Niu et al., 2021)</b>                | Finland                  | Prospective | 2                                                                                                                                                                                                              |
| <b>(Finch &amp; Marriage, 2018)</b>      | New Zealand              | Prospective | 1                                                                                                                                                                                                              |
| <b>(Marconi et al., 2020)</b>            | Not Specified            | Up front    |                                                                                                                                                                                                                |
| <b>(Rios et al., 2019)</b>               | United States of America | Prospective | 3                                                                                                                                                                                                              |
| <b>(Brütting et al., 2021)</b>           | Switzerland              | Up front    | 1                                                                                                                                                                                                              |
| <b>(Peceno et al., 2021)</b>             | Spain                    | Up front    | 1                                                                                                                                                                                                              |
| <b>(Buyle et al., 2019b)</b>             | Belgium                  | Prospective | 1 building cycle of 60 years, however 1-4 wall cycles, refurbishment rates, introduced several cycles of e.g. reusable walls, with a life span of 30 years, thus reuse twice, and replace once after 30 years: |
| <b>(Simoes et al., 2021)</b>             | Portugal                 | Up front    | 1                                                                                                                                                                                                              |
| <b>(Cassiani et al., 2021)</b>           | Colombia                 | Up front    | 1                                                                                                                                                                                                              |
| <b>(Pešta et al., 2020)</b>              | Czech Republic           | Both        | 1-2 (scenario 2-4 assess Two life cycles of wall, life span of one wall: 50 years)                                                                                                                             |

|                                          |                                                                                                  |             |                                                                                                |
|------------------------------------------|--------------------------------------------------------------------------------------------------|-------------|------------------------------------------------------------------------------------------------|
| <b>(Ferriss, 2021)</b>                   | United States of America                                                                         | Up front    | 1                                                                                              |
| <b>(Ali et al., 2020)</b>                | United States of America                                                                         | Up front    | 1                                                                                              |
| <b>(Ramos et al., 2021)</b>              | Not Specified                                                                                    | Up front    | 1                                                                                              |
| <b>(Aversa et al., 2019)</b>             | Italy                                                                                            | Up front    | 1                                                                                              |
| <b>(Kakkos et al., 2020)</b>             | Switzerland                                                                                      | Prospective | 1,                                                                                             |
| <b>(Moreno-Juez et al., 2020)</b>        | the Netherlands and Spain ("The EoL concrete wastes were collected from two European locations") | Up front    | 1                                                                                              |
| <b>(Rasmussen et al., 2019)</b>          | Denmark                                                                                          | Both        | 1                                                                                              |
| <b>(Bertolini &amp; Guardigli, 2020)</b> | Vancouver, Durban, Chennai (however, performed at a desktop study, with lit references)          | Up front    | 1                                                                                              |
| <b>(Mostert et al., 2020)</b>            | Germany                                                                                          | Up front    | 1                                                                                              |
| <b>(Zhao et al., 2020)</b>               | Belgium                                                                                          | Up front    | 1                                                                                              |
| <b>(Capuano et al., 2020)</b>            | Not Specified                                                                                    | Up front    | "1, however also ""The reclaimed asphalt from each maintenance cycle is reintroduced in the BC |
| <b>(Quintana-Gallardo et al., 2021)</b>  | Spain                                                                                            | Up front    | production process in the proportion of 20% for wear layer and of 30% for binder and base      |

Table S2. LCA characteristics

| Ref.                            | LCA reference  | LCA approach | LCA scope/System boundary | LCA scope | LCI        | LCIA method applied | PS modelling (software) |
|---------------------------------|----------------|--------------|---------------------------|-----------|------------|---------------------|-------------------------|
|                                 |                |              |                           |           | Background |                     |                         |
| <b>(Bonoli et al., 2020)</b>    | ISO 14040      | Inconclusive | Cradle-to-gate            | Embodied  | Several    | CML                 | SimaPro                 |
| <b>(van Stijn et al., 2021)</b> | EN 15804/15978 | ALCA         | Cradle-to-gate w. options | Embodied  | Ecoinvent  | CML                 | OpenLCA                 |

|                                       |                       |              |                                                       |          |              |              |                                                            |
|---------------------------------------|-----------------------|--------------|-------------------------------------------------------|----------|--------------|--------------|------------------------------------------------------------|
| <b>(Wiprachtiger et al., 2020)</b>    | Inconclusive          | CLCA         | Cradle-to-grave w. potentials beyond system boundary  | Embodied | Several      | Several      | Brightway                                                  |
| <b>(Romnée et al., 2019)</b>          | Inconclusive          | ALCA         | Cradle-to-grave w. potentials beyond system boundary  | Embodied | Ecoinvent    | ReCiPe       | SimaPro                                                    |
| <b>(Sanchez et al., 2019)</b>         | ISO 14040/44          | CLCA         | Cradle-to-gate w. options                             | Embodied | Inconclusive | TRACI        | Tally <sup>®</sup><br>aInconclusive<br>ATHENA <sup>®</sup> |
| <b>(Sandanayake et al., 2022)</b>     | ISO 14040/44          | Inconclusive | Cradle-to-gate                                        | embodied | Several      | Inconclusive | Manual calculations                                        |
| <b>(Russo et al., 2021)</b>           | ISO 14040             | Inconclusive | Cradle-to-gate w. options                             | Embodied | Several      | ReCiPe       | SimaPro                                                    |
| <b>(Meek et al., 2021)</b>            | ISO 14044 and EN15804 | ALCA         | Cradle-to-gate                                        | Embodied | Several      | IPCC         | OpenLCA                                                    |
| <b>(Lopez-Garcia et al., 2021)</b>    | ISO 14040/44          | Inconclusive | Cradle-to-gate                                        | Embodied | Ecoinvent    | Several      | SimaPro                                                    |
| <b>(Toniolo et al., 2021)</b>         | ISO 14067             | Inconclusive | Cradle-to-grave wo. potentials beyond system boundary | Full     | Ecoinvent    | IPCC         | Manual calculations                                        |
| <b>(Vandewalle et al., 2020)</b>      | ISO 14040             | ALCA         | Cradle-to-gate w. options                             | Embodied | Ecoinvent    | Impact 2002+ | SimaPro                                                    |
| <b>(Caneda-martínez et al., 2021)</b> | EN 15804              | Inconclusive | Cradle-to-gate                                        | Embodied | ELCD         | CML          | OpenLCA                                                    |
| <b>(Caldas et al., 2021)</b>          | EN 15978              | ALCA         | Cradle-to-gate w. options                             | Embodied | Ecoinvent    | Several      | Inconclusive                                               |
| <b>(Vitale et al., 2021)</b>          | ISO 14040/44          | ALCA         | Cradle-to-gate                                        | Embodied | Ecoinvent    | Impact 2002+ | SimaPro                                                    |

|                                       |                                    |              |                                                       |          |              |              |                     |
|---------------------------------------|------------------------------------|--------------|-------------------------------------------------------|----------|--------------|--------------|---------------------|
| <b>(Nußholz et al., 2019)</b>         | Inconclusive                       | Inconclusive | Cradle-to-gate                                        | embodied | Several      | Inconclusive | Manual calculations |
| <b>(Al-Hamrani et al., 2021)</b>      | Inconclusive                       | Inconclusive | Cradle-to-gate                                        | Embodied | Several      | Inconclusive | Manual calculations |
| <b>(Silva et al., 2021)</b>           | ISO 14040/44                       | ALCA         | Cradle-to-gate                                        | Embodied | Several      | Several      | GaBi                |
| <b>(Mostert et al., 2021)</b>         | ISO 14040 and EN15804/EN15978      | Inconclusive | Cradle-to-gate w. options                             | Embodied | GaBi         | Several      | OpenLCA             |
| <b>(Zhang et al., 2018)</b>           | Inconclusive                       | Inconclusive | Cradle-to-gate w. options                             | Embodied | Several      | Inconclusive | Manual calculations |
| <b>(Saadé et al., 2022)</b>           | Inconclusive                       | Inconclusive | Other                                                 | Full     | Ecoinvent    | Several      | PLEIADES®           |
| <b>(Colangelo et al., 2020)</b>       | ISO 14040/44                       | Inconclusive | Cradle-to-gate w. options                             | Embodied | Ecoinvent    | Impact 2002+ | SimaPro             |
| <b>(Rodrigo-Bravo et al., 2022)</b>   | ISO 14040/44                       | Inconclusive | Cradle-to-grave wo. potentials beyond system boundary | Embodied | Inconclusive | CML          | SimaPro             |
| <b>(Uceda-Rodríguez et al., 2022)</b> | ISO 14040                          | Inconclusive | Cradle-to-gate                                        | Embodied | Ecoinvent    | CML          | SimaPro             |
|                                       |                                    |              | 0                                                     | 0        |              |              |                     |
| <b>(Lozano-Miralles et al., 2018)</b> | ISO 14040/44                       | Inconclusive | Cradle-to-gate                                        | Embodied | Inconclusive | Several      | SimaPro             |
| <b>(L. Eberhardt et al., 2019a)</b>   | EN 15978                           | Inconclusive | Cradle-to-gate w. options                             | Embodied | Ecoinvent    | CML          | OpenLCA             |
| <b>(Nasir et al., 2017)</b>           | ISO 14040                          | Inconclusive | Cradle-to-gate                                        | Embodied | Ecoinvent    | IPCC         | Manual calculations |
| <b>(Tsioka &amp; Voudrias, 2020)</b>  | ISO 14044 and specified guidelines | ALCA         | Cradle-to-gate                                        | Embodied | Ecoinvent    | Several      | SimaPro             |

|                                      |                                    |              |                                                       |          |                           |              |                     |
|--------------------------------------|------------------------------------|--------------|-------------------------------------------------------|----------|---------------------------|--------------|---------------------|
| <b>(Diaz-Piloneta et al., 2021)</b>  | ISO 14040                          | Inconclusive | Cradle-to-gate w. options                             | Embodied | Ecoinvent                 | IPCC         | SimaPro             |
| <b>(Buyle et al., 2019a)</b>         | ISO                                | CLCA         | Cradle-to-gate w. options                             | Embodied | Ecoinvent                 | ReCiPe       | Inconclusive        |
| <b>(Liikanen et al., 2019)</b>       | ISO 14040/44                       | Inconclusive | Cradle-to-gate                                        | Embodied | GaBi                      | ReCiPe       | GaBi                |
| <b>(van Stijn et al., 2020)</b>      | EN 15978                           | ALCA         | Cradle-to-grave wo. potentials beyond system boundary | Embodied | Ecoinvent                 | CML          | OpenLCA             |
| <b>(Brütting et al., 2019)</b>       | Inconclusive                       | Inconclusive | Cradle-to-gate                                        | Embodied | EPDs                      | Inconclusive | Manual calculations |
| <b>(Hossain et al., 2021)</b>        | ISO 14040/44                       | Inconclusive | Cradle-to-gate                                        | Embodied | Several                   | IPCC         | SimaPro             |
| <b>(Terrones-Saeta et al., 2021)</b> | ISO 14040/44                       | Inconclusive | Cradle-to-gate                                        | Embodied | Ecoinvent                 | CML          | SimaPro             |
| <b>(Joensuu et al., 2022)</b>        | ISO 14044 and specified guidelines | Inconclusive | Cradle-to-grave wo. potentials beyond system boundary | Full     | Several                   | Inconclusive | Manual calculations |
|                                      |                                    |              | 0                                                     | 0        |                           |              |                     |
| <b>(Di Maria et al., 2018)</b>       | Inconclusive                       | ALCA         | Cradle-to-gate                                        | Embodied | Ecoinvent                 | ReCiPe       | GaBi                |
| <b>(L. Eberhardt et al., 2019b)</b>  | EN 15978                           | Inconclusive | Cradle-to-gate w. options                             | Embodied | Ecoinvent                 | CML          | OpenLCA             |
|                                      |                                    |              | 0                                                     | 0        |                           |              |                     |
| <b>(Wang et al., 2017)</b>           | Inconclusive                       | Inconclusive | Cradle-to-gate w. options                             | Embodied | World Resources Institute | IPCC         | Manual calculations |
|                                      |                                    |              | 0                                                     | 0        |                           |              |                     |

|                                     |                                    |              |                           |          |              |                                                                                            |                     |
|-------------------------------------|------------------------------------|--------------|---------------------------|----------|--------------|--------------------------------------------------------------------------------------------|---------------------|
| <b>(Zhang et al., 2021)</b>         | ISO                                | Inconclusive | Cradle-to-gate w. options | Full     | Ecoinvent    | Several                                                                                    | OpenLCA             |
| <b>(Dias et al., 2021)</b>          | Inconclusive                       | ALCA         | Cradle-to-gate w. options | Embodied | Inconclusive | Inconclusive                                                                               | Inconclusive        |
| <b>(Cuenca-Moyano et al., 2019)</b> | ISO 14040/44                       | Inconclusive | Cradle-to-gate            | Embodied | Several      | Several                                                                                    | SimaPro             |
| <b>(Kakkos et al., 2019)</b>        | EN 15804                           | Inconclusive | Cradle-to-gate w. options | Both     | Ecoinvent    | Several                                                                                    | SimaPro             |
| <b>(Brambilla et al., 2019)</b>     | ISO 14040/44                       | Inconclusive | Cradle-to-gate w. options | Embodied | Several      | CML                                                                                        | Manual calculations |
| <b>(Eberhardt et al., 2021)</b>     | EN 15978                           | Inconclusive | Cradle-to-gate w. options | Embodied | Ecoinvent    | CML                                                                                        | OpenLCA             |
| <b>(Weimann et al., 2021)</b>       | ISO 14040/44                       | Inconclusive | Cradle-to-gate w. options | Embodied | Ecoinvent    | Several                                                                                    | Umberto             |
| <b>(Antunes et al., 2021)</b>       | EN 15978                           | Inconclusive | Other                     | Embodied | Ecoinvent    | ILCD                                                                                       | SimaPro             |
| <b>(Ma et al., 2021)</b>            | ISO 14040                          | Inconclusive | Cradle-to-gate w. options | Embodied | OneClick LCA | Chinese National Standard "Building carbon emission calculation standard (GB/T51366-2019)" | OneClick LCA        |
| <b>(Gravagnuolo et al., 2020)</b>   | ISO 14044 and specified guidelines | Inconclusive | Cradle-to-gate w. options | Embodied | OneClick LCA | Inconclusive                                                                               | OneClick LCA        |
| <b>(Suarez-Macias et al., 2021)</b> | ISO 14040/44                       | Inconclusive | Cradle-to-gate            | Embodied | Ecoinvent    | CML                                                                                        | SimaPro             |
| <b>(Minunno et al., 2020)</b>       | ISO 14040/44                       | ALCA         | Cradle-to-gate w. options | Embodied | Ecoinvent    | CML                                                                                        | SimaPro             |

|                                          |                              |              |                                                                |          |                    |              |                                |
|------------------------------------------|------------------------------|--------------|----------------------------------------------------------------|----------|--------------------|--------------|--------------------------------|
| <b>(Kim &amp; Kim, 2020)</b>             | Inconclusive                 | Inconclusive | Cradle-to-grave<br>wo. potentials<br>beyond system<br>boundary | Embodied | Korean LCI DB      | Inconclusive | Manual<br>calculations         |
| <b>(Kucukvar et al., 2021)</b>           | Inconclusive                 | Inconclusive | Cradle-to-grave<br>wo. potentials<br>beyond system<br>boundary | Full     | Ecoinvent          | ReCiPe       | Manual<br>calculations         |
|                                          |                              |              | 0                                                              | 0        |                    |              |                                |
| <b>(Kio &amp; Ali, 2021)</b>             | Inconclusive                 | Inconclusive | Cradle-to-gate<br>w. options                                   | Embodied | Tally <sup>®</sup> | Inconclusive | Tally<br>aInconclusive<br>WARM |
| <b>(Hossain &amp; Ng, 2019)</b>          | ISO 14040/44                 | Inconclusive | Cradle-to-grave<br>wo. potentials<br>beyond system<br>boundary | Embodied | Several            | Impact 2002+ | SimaPro                        |
| <b>(Monteiro &amp; Soares, 2022)</b>     | ISO 14040/44                 | ALCA         | Cradle-to-gate<br>w. options                                   | Full     | Inconclusive       | CED          | Inconclusive                   |
| <b>(Cascione et al., 2022)</b>           | EN 15804                     | ALCA         | Cradle-to-gate<br>w. options                                   | Embodied | Ecoinvent          | EuGeos       | OpenLCA                        |
| <b>(Peceno et al., 2020)</b>             | ISO 14040/44                 | ALCA         | Cradle-to-grave<br>wo. potentials<br>beyond system<br>boundary | Embodied | Ecoinvent          | CML          | SimaPro                        |
| <b>(Zimmermann et al., 2020)</b>         | EN 15978                     | Inconclusive | Cradle-to-gate<br>w. options                                   | Full     | Several            | CML          | LCAbg                          |
| <b>(Zanni et al., 2018)</b>              | Inconclusive                 | Inconclusive | Cradle-to-gate                                                 | Embodied | Ecoinvent          | Impact 2002+ | SimaPro                        |
| <b>(L. C. M. Eberhardt et al., 2019)</b> | ISO 14040/44<br>and EN 15978 | ALCA         | Cradle-to-gate<br>w. options                                   | Embodied | Ecoinvent          | CML          | OpenLCA                        |
| <b>(Rivero et al., 2016)</b>             | Inconclusive                 | Inconclusive | Cradle-to-gate<br>w. options                                   | Embodied | Several            | IPCC         | Manual<br>calculations         |

|                                     |                                       |              |                                                      |          |                                  |              |                     |
|-------------------------------------|---------------------------------------|--------------|------------------------------------------------------|----------|----------------------------------|--------------|---------------------|
|                                     |                                       |              | 0                                                    | 0        |                                  |              |                     |
| <b>(Rajagopalan et al., 2021)</b>   | PEF                                   | Inconclusive | Cradle-to-gate w. options                            | Embodied | Inconclusive                     | Inconclusive | Inconclusive        |
| <b>(Ghisellini et al., 2021)</b>    | ISO 14040                             | Inconclusive | Cradle-to-gate                                       | Embodied | Ecoinvent                        | CED          | SimaPro             |
| <b>(Niu et al., 2021)</b>           | Inconclusive                          | ALCA         | Cradle-to-gate w. options                            | Embodied | Ecoinvent                        | Several      | Inconclusive        |
|                                     |                                       |              | 0                                                    | 0        |                                  |              |                     |
| <b>(Finch &amp; Marriage, 2018)</b> | Inconclusive                          | Inconclusive | Cradle-to-gate                                       | Embodied | SCION                            | Inconclusive | Inconclusive        |
|                                     |                                       |              | 0                                                    | 0        |                                  |              |                     |
| <b>(Marconi et al., 2020)</b>       | ISO 14040/44                          | Inconclusive | Cradle-to-gate                                       | Embodied | Ecoinvent                        | ReCiPe       | SimaPro             |
| <b>(Rios et al., 2019)</b>          | ILCD                                  | ALCA         | Cradle-to-gate w. options                            | Embodied | Several                          | Inconclusive | Inconclusive        |
|                                     |                                       |              |                                                      |          |                                  |              |                     |
| <b>(Brütting et al., 2021)</b>      | Inconclusive                          | Inconclusive | Cradle-to-gate w. options                            | Embodied | Swiss Federal LCA database, KBOB | Inconclusive | Manual calculations |
| <b>(Peceno et al., 2021)</b>        | ISO 14040/44                          | Inconclusive | Cradle-to-gate w. options                            | Embodied | Ecoinvent                        | ReCiPe       | SimaPro             |
| <b>(Buyle et al., 2019b)</b>        | ISO 14040/44                          | CLCA         | Cradle-to-gate w. options                            | Embodied | Ecoinvent                        | ReCiPe       | Inconclusive        |
| <b>(Simoes et al., 2021)</b>        | ISO 14040/44 and specified guidelines | Inconclusive | Cradle-to-gate w. options                            | Embodied | Inconclusive                     | Several      | Inconclusive        |
| <b>(Cassiani et al., 2021)</b>      | ISO 14040/44                          | Inconclusive | Cradle-to-gate                                       | Embodied | PaLATE                           | PaLATE       | PaLATE              |
| <b>(Pešta et al., 2020)</b>         | ISO 14044 and specified guidelines    | Inconclusive | Cradle-to-grave w. potentials beyond system boundary | Embodied | Ecoinvent                        | Several      | GaBi                |

|                                          |                                         |              |                              |          |            |              |                        |
|------------------------------------------|-----------------------------------------|--------------|------------------------------|----------|------------|--------------|------------------------|
| <b>(Ferriss, 2021)</b>                   | Inconclusive                            | Inconclusive | Cradle-to-gate<br>w. options | Both     | GaBi       | Inconclusive | Tally, REVIT<br>plugin |
| <b>(Ali et al., 2020)</b>                | ISO                                     | Inconclusive | Cradle-to-gate               | Embodied | Literature | Inconclusive | Manual<br>calculations |
| <b>(Ramos et al., 2021)</b>              | ISO 14040/44                            | Inconclusive | Cradle-to-gate<br>w. options | Embodied | Several    | CML          | GaBi                   |
| <b>(Aversa et al., 2019)</b>             | ISO 14044 and<br>EN 15804               | Inconclusive | Cradle-to-gate               | Embodied | EPDs       | CML          | Manual<br>calculations |
|                                          |                                         |              | 0                            | 0        |            |              |                        |
| <b>(Kakkos et al., 2020)</b>             | EN 15804 and<br>specified<br>guidelines | Inconclusive | Cradle-to-gate<br>w. options | Full     | Ecoinvent  | Several      | SimaPro                |
| <b>(Moreno-Juez et al., 2020)</b>        | ISO 14040/44                            | Inconclusive | Cradle-to-gate               | Embodied | Several    | CML          | OpenLCA                |
| <b>(Rasmussen et al., 2019)</b>          | EN 15978                                | Inconclusive | Cradle-to-gate<br>w. options | Embodied | Ökobau     | CML          | LCabyg                 |
| <b>(Bertolini &amp; Guardigli, 2020)</b> | EN 15978                                | ALCA         | Cradle-to-gate<br>w. options | Embodied | EPDs       | CML          | Inconclusive           |
| <b>(Mostert et al., 2020)</b>            | EN 15804                                | Inconclusive | Cradle-to-gate<br>w. options | Embodied | GaBi       | Several      | OpenLCA                |
| <b>(Zhao et al., 2020)</b>               | ISO 14040/44                            | Inconclusive | Cradle-to-gate               | Embodied | Ecoinvent  | ILCD         | SimaPro                |
| <b>(Capuano et al., 2020)</b>            | ISO 14040/44                            | Inconclusive | Cradle-to-gate<br>w. options | Embodied | Ecoinvent  | CML          | OpenLCA                |
| <b>(Quintana-Gallardo et al., 2021)</b>  | ISO 14040 and<br>EN 15804               | CLCA         | Cradle-to-gate               | Embodied | Ecoinvent  | Several      | SimaPro                |
